# Supplementary material for: STAT3 is a genetic modifier of TGF-beta induced EMT in KRAS mutant pancreatic cancer
Source: eLife journal article supplement (doi:10.7554/elife.92559), 2024-01-30

Original Western Blot Images

Suppl Fig. 1B

ERFK1/2 >

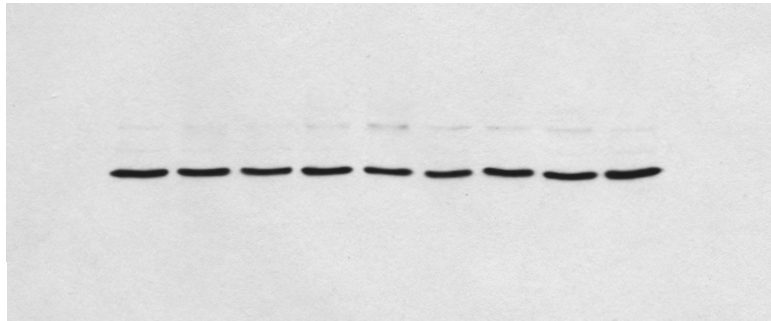

Suppl Fig. 1B

Phospho-ERK >

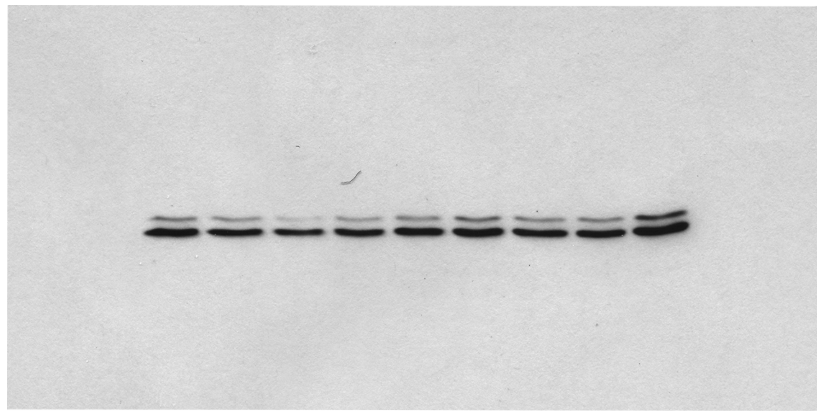

Suppl Fig 1B

STAT3 >

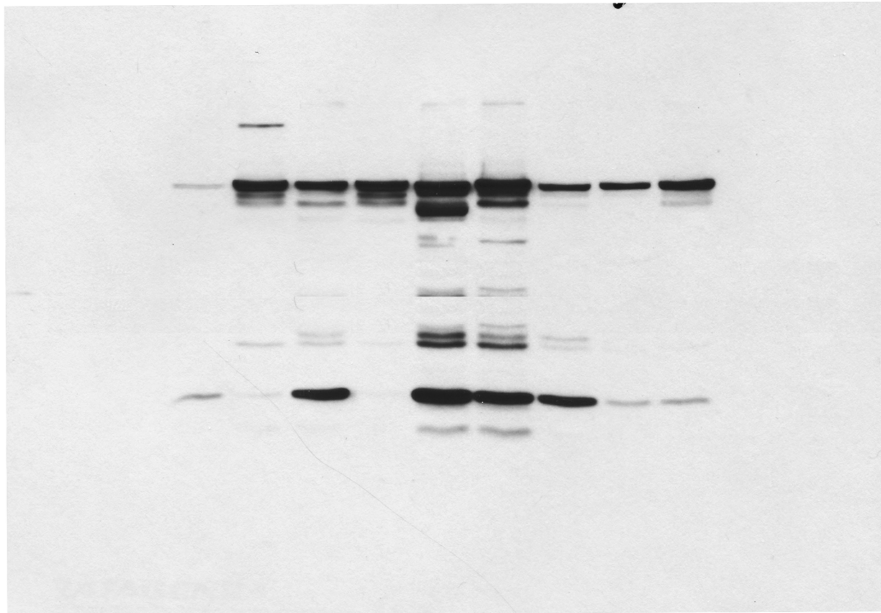

Suppl Fig 1B

Phospho-STAT3 >

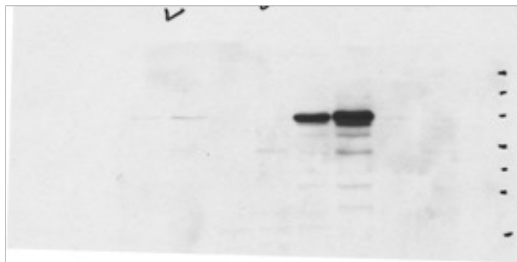

Suppl Fig 1B

AKT >

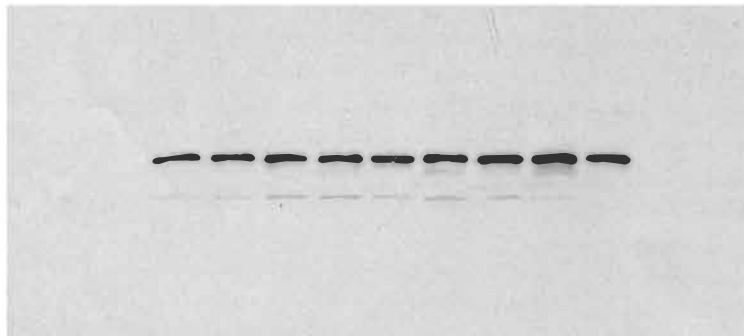

Supplement: fig1-figsupp1-data1 [file Suppl Figure 1-source data 2.pdf › Suppl Figure 1-source data/Suppl Figure 1-source data 2.pdf]
