# Supplementary material for: STAT3 is a genetic modifier of TGF-beta induced EMT in KRAS mutant pancreatic cancer
Source: eLife. 2024 Apr 4;13:RP92559. doi: 10.7554/eLife.92559 (PMC10994661; doi:10.7554/eLife.92559)
Supplement: Figure 4—source data 1. [file elife-92559-fig4-data1.xlsx]

## Sheet: Sheet1
Figure 4 -source data 1: Top up- or down-regulated genes in murine KPC STAT3 KO or SMAD4 KO cells derived from RNA-Seq
SMAD4KO UP		SMAD4KO DOWN	STAT3KO UP		STAT3 KO DOWN
ACSL5	MLF2	ABR	ABCA1	MFAP3L	ABCC3	FAM83F	NUP210	TNS4
AKT1	MUC1	ADAMTS9	ABCG1	MGST1	ADAP1	FCGR3B	ONECUT3	TPD52L1
ANXA2	NCL	AFAP1	ACSL6	MST1R	ADCY1	FCHO1	PAQR5	TSPAN33
ANXA3	PGK1	ATP9A	ADAM19	MXRA8	ADORA1	FFAR4	PARD6B	TTBK1
ANXA4	PSMB4	CBLN1	ADAMTS7	NELL2	AIFM3	GATA5	PHLDA2	VIL1
APRT	PTGES3	CDK20	ADAMTSL3	NFKBID	ALDH1L1	GCNT3	PKHD1L1	VSTM5
ARPC2	S100A6	COL7A1	AKAP6	NPAS3	ALPL	GDA	PLAT	WDR72
ATP5MK	SLC25A1	COQ3	AXIN2	NTN1	ANKS4B	GJB2	PLEKHA7	WNT7A
BSG	SLC25A5	CRLF1	C1QTNF1	OLFML2A	ANXA10	GLT1D1	PLEKHB1	ZDHHC23
CALM2	SNRPE	DBN1	CHST3	PALM3	ATP4A	HOMER2	PPL
CAPG	TAGLN2	ECE2	CLDN3	PCDH18	ATP6V1B1	HPCAL4	PPP1R26
CCT2	TECR	EIF3A	CMTM3	PCDH19	ATP7B	HS6ST2	PRDM16
CCT5	TKT	EMB	CNTLN	PCDHB5	AVIL	ICAM1	PREX1
CCT6A	TLE5	ENG	COL12A1	PCYT1B	B4GALNT3	IGDCC4	PRR15L
CDH1	TMBIM6	FAXC	COL5A3	PDE9A	BCL11B	IHH	PRXL2B
CORO1B	TSPAN8	FN1	COL8A1	PDGFRL	CAMKV	IL18R1	RASAL1
COX6A1	TUBB4B	FOXRED2	CPQ	PENK	CAMSAP3	IL22RA1	RASEF
COX8A	VASP	FST	CSDC2	PLA2G7	CBFA2T3	IQGAP2	RIPOR2
CPTP	YWHAZ	GAB2	CSGALNACT1	PLCB4	CD274	ITGA1	RNF208
CST3		GPLD1	CTHRC1	PLCL1	CDHR2	ITPKA	S100A14
DAP		ID3	CYP7B1	PRKD1	CDKN1C	JAG2	SCARF2
DBI		IL13RA1	DENND2A	RASGRP3	CHST15	KCNK1	SCGB1A1
EIF3H		IL6R	DKK2	RCN1	CKB	KRT13	SEL1L3
ELF3		IRAK3	EMB	RGS2	CLCA4	KRT7	SEMA4D
ENO1		KIF3C	EPCAM	RHOJ	CLDN2	LEPR	SFTPC
EZR		LONRF3	EPHB6	SATB1	CLDN6	LGALS4	SGPP2
FAU		MAP3K6	FAM110B	SEMA3A	CLDN7	LINGO3	SHC2
FKBP4		PREX1	FAT4	SERPINE2	CLIC6	LRRC66	SHISA6
GAS5		RTTN	FGFR1	SERTAD4	CRB3	MAL	SLC22A18
GSTO1		SCARF2	FSTL3	SLC7A2	CTSE	MAL2	SLC25A48
H3-3B		SNAI1	FUT4	SLITRK5	DCDC2	MAOB	SLC44A4
HMGN1		SORCS2	GAS1	SPON2	DDC	MAP3K9	SLC4A11
HNF4A		SPARC	GLI3	STING1	DEGS2	MEG3	SLIT1
HNRNPU		SPTB	GPER1	STRA6	DENND1C	MEGF6	SMTNL2
IDH1		SSPN	GPR153	TBC1D9	DIO3	MLF1	SOWAHB
KRT19		TAGLN	GPX8	TENM3	DLL1	MMP10	SOX17
LAMP1		TUBA1A	ID3	TGFB3	DMBT1	MUC1	ST14
LASP1		VCAN	IFITM3	TNC	DSG2	MUCL3	ST3GAL6
LGALS3BP		VIM	IL1RAP	TRPV4	ELMO3	MYH14	THSD4
LGALS4		ZEB2	ISG15	TSPAN13	ENTPD2	NCMAP	TIGIT
			LPAR4	UST	EPS8L3	NFATC2	TJP3
			LPL	VEGFC	ERBB3	NGEF	TM4SF20
			LRRK2		ESPN	NOS1AP	TMEM132C
			MEGF10		EXTL1	NT5C1A	TMPRSS2
